# Supplementary material for: Diversity and evolution of plant diacylglycerol acyltransferase (DGATs) unveiled by phylogenetic, gene structure and expression analyses
Source: PubMed Central journal article supplement (PMC5127155; doi:10.1590/1678-4685-gmb-2016-0024), 2016-10-03
Supplement: 1415-4757-gmb-1678-4685-GMB-2016-0024-Suppl01.pdf [file 1415-4757-gmb-1678-4685-GMB-2016-0024-Suppl01.pdf]

**Table S1** - Species, gene name, accession numbers and protein length of DGAT sequences retrieved in this study.

| Family         | Specie                      | Taxa terminologies | Gene ID                   | Database  | Access    | Length(aa) |
|----------------|-----------------------------|--------------------|---------------------------|-----------|-----------|------------|
| Simmondsiaceae | <i>Simmondsia chinensis</i> | Sch                | WS                        | NCBI      | AAD38041  | 352        |
| Brassicaceae   | <i>Arabidopsis thaliana</i> | Ath                | DGAT3                     | Phytozome | AT1G48300 | 285        |
|                |                             |                    | WS/DGAT                   | Phytozome | AT1G72110 | 479        |
|                |                             |                    | WS/DGAT                   | Phytozome | AT2G38995 | 488        |
|                |                             |                    | WS/DGAT                   | Phytozome | AT3G49190 | 522        |
|                |                             |                    | WS/DGAT                   | Phytozome | AT3G49200 | 507        |
|                |                             |                    | WS/DGAT                   | Phytozome | AT3G49210 | 518        |
|                |                             |                    | WS/DGAT                   | Phytozome | AT5G12420 | 480        |
|                |                             |                    | WS/DGAT                   | Phytozome | AT5G16350 | 488        |
|                |                             |                    | WS/DGAT                   | Phytozome | AT5G22490 | 482        |
|                |                             |                    | WS/DGAT (WSD1)            | Phytozome | AT5G37300 | 481        |
|                |                             |                    | WS/DGAT                   | Phytozome | AT5G53380 | 483        |
|                |                             |                    | WS/DGAT                   | Phytozome | AT5G53390 | 486        |
|                |                             |                    | <i>Arabidopsis lyrata</i> | Aly       | DCR       | Phytozome  |
| DGAT3          | Phytozome                   | 882344             |                           |           | 360       |            |
| WS/DGAT        | Phytozome                   | 330267             |                           |           | 500       |            |

| Family | Specie               | Taxa terminologies | Gene ID | Database  | Access    | Length(aa) |
|--------|----------------------|--------------------|---------|-----------|-----------|------------|
|        |                      |                    | WS/DGAT | Phytozome | 321593    | 474        |
|        |                      |                    | WS/DGAT | Phytozome | 918418    | 488        |
|        |                      |                    | WS/DGAT | Phytozome | 906195    | 503        |
|        |                      |                    | WS/DGAT | Phytozome | 485277    | 521        |
|        |                      |                    | WS/DGAT | Phytozome | 485279    | 519        |
|        |                      |                    | WS/DGAT | Phytozome | 476341    | 425        |
|        | <i>Brassica rapa</i> | Bra                | DGAT3   | Phytozome | Bra014125 | 356        |
|        |                      |                    | WS/DGAT | Phytozome | Bra000109 | 491        |
|        |                      |                    | WS/DGAT | Phytozome | Bra000110 | 476        |
|        |                      |                    | WS/DGAT | Phytozome | Bra008008 | 425        |
|        |                      |                    | WS/DGAT | Phytozome | Bra008010 | 424        |
|        |                      |                    | WS/DGAT | Phytozome | Bra018011 | 538        |
|        |                      |                    | WS/DGAT | Phytozome | Bra018412 | 424        |
|        |                      |                    | WS/DGAT | Phytozome | Bra022653 | 489        |
|        |                      |                    | WS/DGAT | Phytozome | Bra029072 | 490        |
|        |                      |                    | WS/DGAT | Phytozome | Bra029939 | 468        |
|        |                      |                    | WS/DGAT | Phytozome | Bra029939 | 505        |
|        |                      |                    | WS/DGAT | Phytozome | Bra023022 | 438        |
|        |                      |                    | WS/DGAT | Phytozome | Bra037728 | 472        |

| Family        | Specie                     | Taxa terminologies | Gene ID                  | Database  | Access             | Length(aa) |                    |     |
|---------------|----------------------------|--------------------|--------------------------|-----------|--------------------|------------|--------------------|-----|
| Malvaceae     | <i>Gossypium raimondii</i> | Gra                | DGAT3                    | Phytozome | Gorai_007G116800   | 401        |                    |     |
|               |                            |                    | WS/DGAT                  | Phytozome | Gorai.001G154900   | 512        |                    |     |
|               |                            |                    | WS/DGAT                  | Phytozome | Gorai.001G155000   | 510        |                    |     |
|               |                            |                    | WS/DGAT                  | Phytozome | Gorai.004G114800   | 482        |                    |     |
|               |                            |                    | WS/DGAT                  | Phytozome | Gorai.013G132800   |            |                    |     |
|               |                            |                    | WS/DGAT                  | Phytozome | Gorai.013G194100   |            |                    |     |
|               | <i>Theobroma cacao</i>     | Tca                | DGAT3                    | Phytozome | Thecc1EG004941t1   | 401        |                    |     |
|               |                            |                    | WS/DGAT                  | Phytozome | Thecc1EG015402t1   | 540        |                    |     |
|               |                            |                    | WS/DGAT                  | Phytozome | Thecc1EG005148t1   | 510        |                    |     |
| Euphorbiaceae | <i>Ricinus communis</i>    | Rco                | DGAT3                    | Phytozome | 29889t000177       | 332        |                    |     |
|               |                            |                    | WS/DGAT                  | Phytozome | 30024m001745       | 436        |                    |     |
|               |                            |                    | WS/DGAT                  | Phytozome | 29742m001420       | 506        |                    |     |
|               |                            |                    | WS/DGAT                  | Phytozome | 30024.m001745      | 436        |                    |     |
|               |                            |                    | <i>Manihot esculenta</i> | Mes       | DGAT3              | Phytozome  | cassava4_1_010675m | 354 |
|               |                            |                    |                          |           | DGAT3              | Phytozome  | cassava4_1_011887m | 323 |
| WS/DGAT       | Phytozome                  | cassava4.1_006398  |                          |           | 489                |            |                    |     |
| WS/DGAT       | Phytozome                  | cassava4.1_029077  |                          |           | 515                |            |                    |     |
| WS/DGAT       | Phytozome                  | cassava4.1_008553m |                          |           | 415                |            |                    |     |
|               |                            |                    | WS/DGAT                  | Phytozome | cassava4.1_026440m | 406        |                    |     |

| Family     | Specie                      | Taxa terminologies | Gene ID   | Database       | Access               | Length(aa) |
|------------|-----------------------------|--------------------|-----------|----------------|----------------------|------------|
| Salicaceae | <i>Populus trichocarpa</i>  | Ptr                | DGAT3     | Phytozome      | Potri.010G003200     | 351        |
|            |                             |                    | WS/DGAT   | Phytozome      | Potri.012G014200     | 525        |
|            |                             |                    | WS/DGAT   | Phytozome      | Potri.019G070900     | 497        |
|            |                             |                    | WS/DGAT   | Phytozome      | Potri.T170200        | 496        |
|            |                             |                    | WS/DGAT   | Phytozome      | Potri.T076800        | 492        |
| Fabaceae   | <i>Medicago truncatula</i>  | Mtr                | DGAT3     | Phytozome      | Medtr4g124080        | 341        |
|            |                             |                    | WS/DGAT   | Phytozome      | Medtr1g008160        | 483        |
|            | <i>Glycine max</i>          | Gma                | DGAT3     | Phytozome      | Glyma13g17860        | 327        |
|            |                             |                    | DGAT3     | Phytozome      | Glyma17g04650        | 338        |
|            |                             |                    | WS/DGAT   | Phytozome      | Glyma09g32890        |            |
|            | <i>Arachis hypogaea</i>     | Ahy                | DGAT3     | NCBI           | AAX62735             | 345        |
| Solanaceae | <i>Solanum tuberosum</i>    | Stu                | DGAT3     | Phytozome      | PGSC0003DMP400008124 | 413        |
|            |                             |                    | WS/DGAT   | Phytozome      | PGSC0003DMP400065033 | 519        |
|            |                             |                    | WS/DGAT   | Phytozome      | PGSC0003DMP400069241 | 506        |
|            |                             |                    | WS/DGAT   | Phytozome      | PGSC0003DMP400016066 | 450        |
|            |                             |                    | WS/DGAT   | Phytozome      | PGSC0003DMP400000246 | 496        |
|            | <i>Solanum lycopersicum</i> | Sly                | DGAT3     | Phytozome      | Solyc12g098850_1_1   | 409        |
| WS/DGAT    |                             |                    | Phytozome | Solyc01g011430 | 506                  |            |
| WS/DGAT    |                             |                    | Phytozome | Solyc03g083380 | 500                  |            |

| Family        | Specie                    | Taxa terminologies | Gene ID | Database  | Access            | Length(aa) |
|---------------|---------------------------|--------------------|---------|-----------|-------------------|------------|
|               |                           |                    | WS/DGAT | Phytozome | Solyc10g009430    | 515        |
|               |                           |                    | WS/DGAT | Phytozome | Solyc01g095960    | 505        |
| Ranunculaceae | <i>Aquilegia coerulea</i> | Aco                | DGAT3   | Phytozome | Aquca_003_00301_1 | 370        |
|               |                           |                    | WS/DGAT | Phytozome | Aquca_035_00223   | 499        |
| Poaceae       | <i>Sorghum bicolor</i>    | Sbi                | DGAT3   | Phytozome | Sb09g002950       | 407        |
|               |                           |                    | WS/DGAT | Phytozome | Sb03g035790       | 519        |
|               |                           |                    | WS/DGAT | Phytozome | Sb09g027970       | 554        |
|               |                           |                    | WS/DGAT | Phytozome | Sb02g001860       | 491        |
|               | <i>Oryza sativa</i>       | Osa                | DGAT3   | Phytozome | Loc_Os05g04620    | 409        |
|               |                           |                    | WS/DGAT | Phytozome | LOC_Os01g56360    | 518        |
|               |                           |                    | WS/DGAT | Phytozome | LOC_Os05g48260    | 565        |
|               |                           |                    | WS/DGAT | Phytozome | LOC_Os01g56360    | 518        |
|               | <i>Setaria italica</i>    | Sti                | DGAT3   | Phytozome | Si022184m         | 414        |
|               |                           |                    | WS/DGAT | Phytozome | Si021641m         | 558        |
|               |                           |                    | WS/DGAT | Phytozome | Si001086m         | 511        |
|               |                           |                    | WS/DGAT | Phytozome | Si000956m         | 538        |
|               |                           |                    | WS/DGAT | Phytozome | Si035229m         | 515        |
|               |                           |                    | WS/DGAT | Phytozome | Si029701m         | 477        |
|               | <i>Zea mays</i>           | Zma                | DGAT3   | Phytozome | GRMZM2G122943     | 411        |

| Family          | Specie                            | Taxa terminologies | Gene ID | Database  | Access        | Length(aa) |
|-----------------|-----------------------------------|--------------------|---------|-----------|---------------|------------|
|                 |                                   |                    | WS/DGAT | Phytozome | GRMZM2G077375 | 525        |
|                 | <i>Brachypodium distachyon</i>    | Bdi                | DGAT3   | Phytozome | Bradi2g36890  | 410        |
|                 |                                   |                    | WS/DGAT | Phytozome | Bradi2g17077  | 537        |
|                 |                                   |                    | WS/DGAT | Phytozome | Bradi3g18630  | 506        |
|                 |                                   |                    | WS/DGAT | Phytozome | Bradi2g51150  | 503        |
|                 |                                   |                    | WS/DGAT | Phytozome | Bradi2g46640  | 519        |
|                 |                                   |                    | WS/DGAT | Phytozome | Bradi3g18636  | 478        |
| Selaginellaceae | <i>Selaginella moellendorffii</i> | Smo                | DGAT3   | Phytozome | 406024        | 229        |
|                 |                                   |                    | WS/DGAT | Phytozome | 80096         | 512        |
|                 |                                   |                    | WS/DGAT | Phytozome | 235299        | 452        |
| Funariaceae     | <i>Physcomitrella patens</i>      | Ppa                | DGAT3   | Phytozome | Pp1s48149V6   | 461        |
|                 |                                   |                    | DGAT3   | Phytozome | Pp1s65_269V6  | 462        |
|                 |                                   |                    | WS/DGAT | Phytozome | Pp1s279_34V6  | 515        |
| Mamiellaceae    | <i>Ostreococcus lucimarinus</i>   | Olu                | DGAT3   | Phytozome |               |            |
|                 |                                   |                    | WS/DGAT | Phytozome | 94705         | 365        |
| Volvocaceae     | <i>Volvox carteri</i>             | Vca                | DGAT3   | Phytozome | 103228        | 370        |
|                 |                                   |                    | WS/DGAT | Phytozome | -             | -          |
|                 | <i>Rhodotorula glutinis</i>       | Rgl                | DGAT3   | NCBI      | ABC41546      |            |
|                 | <i>Acinetobacter</i> sp.          | Aci                | WS/DGAT | NCBI      | YP045555      | 458        |
