# Supplementary material for: Diversity and evolution of plant diacylglycerol acyltransferase (DGATs) unveiled by phylogenetic, gene structure and expression analyses
Source: PubMed Central journal article supplement (PMC5127155; doi:10.1590/1678-4685-gmb-2016-0024), 2016-10-03
Supplement: 1415-4757-gmb-1678-4685-GMB-2016-0024-Suppl02.pdf [file 1415-4757-gmb-1678-4685-GMB-2016-0024-Suppl02.pdf]

**Table S2** - Nucleotide sequences of primers used in RT-qPCR analysis and amplicon length.

| <b>Acronym</b> | <b>Forward primer sequence (5'-3')</b> | <b>Reverse primer sequence (5'-3')</b> | <b>Amplicon size (bp)</b> | <b>Locus accession number</b> |
|----------------|----------------------------------------|----------------------------------------|---------------------------|-------------------------------|
| DGAT3A         | CGAGAAACTTGCCATGTTC                    | GTTTGGCCTTTATCTCTTGCTTT                | 140                       | Glyma13g17860                 |
| DGAT3B         | GAAGGCCAAACTCAAAGCTG                   | CATTCGCATCCTCAACAATG                   | 221                       | Glyma17g04650                 |
| WS/DGAT        | GGCCACAATAGACCGAAAG                    | AGGCACATTGGAGAAGGCTA                   | 287                       | Glyma09g32890                 |
| DGAT1A         | GCGACGCCGCCAATTCG                      | GTTGAAGAGGCCCGCGTACT                   | 158                       | Glyma13g16560                 |
| DGAT1B         | CAATTCCCAACAGCAAAACG                   | AAGGTTGAAGAGGCCCGC                     | 166                       | Glyma17g06120                 |
| DGAT2A         | GTTGACAAAAACCGAGAACCAACCA              | ATTTTCATTCACCAACTCCATCCCC              | 223                       | Glyma01g36011                 |
| DGAT2B         | CCTGGTTCAGTTTTCTGCTTTGG                | CAACCTCCTCAGGAGTTGGCTCGT               | 218                       | Glyma09g32790                 |
| DGAT2C         | CCTGGTTCAGTTTTCTGCTTTGG                | AAACTATGGAAAGGGGCATTGGG                | 162                       | Glyma11g09410                 |
| DGAT2D         | CCTGGTTCAGTTTTCTGCTTTGG                | ACCTCCTCAGGAGTTGGCTCGG                 | 216                       | Glyma16g21960                 |
| DGAT2E         | CTTGTTCCAGTTTTCTGCTTTG                 | ACCTGCTCCATTGTTGGTTCT                  | 215                       | Glyma16g21970                 |
| CYP2*          | CGGGACCAGTGTGCTTCTCA                   | CCCCTCCACTACAAAGGCTCG                  | 154                       | CF806591                      |
| ELF1B*         | GTTGAAAAGCCAGGGGACA                    | TCTTACCCCTTGAGCGTGG                    | 118                       | EV279336                      |
| ACT*           | CGGTGGTTCTATCTTGGCATC                  | GTCTTTCGCTTCAATAACCCTA                 | 142                       | BW652479                      |
| TUA*           | AGGTCGGAAACTCCTGCTGG                   | AAGGTGTTGAAGGCGTCGTG                   | 159                       | CA801144                      |

\*Primers used as reference genes
