# Supplementary material for: Diversity and evolution of plant diacylglycerol acyltransferase (DGATs) unveiled by phylogenetic, gene structure and expression analyses
Source: PubMed Central journal article supplement (PMC5127155; doi:10.1590/1678-4685-gmb-2016-0024), 2016-10-03
Supplement: 1415-4757-gmb-1678-4685-GMB-2016-0024-Suppl03.pdf [file 1415-4757-gmb-1678-4685-GMB-2016-0024-Suppl03.pdf]

**Table S3** - Selected diacylglycerol acyltransferase (DGAT) genes used in the GENEVESTIGATOR expression analysis.

| <b>Organism</b>             | <b>Gene symbol</b> | <b>Locus access</b> | <b>Microarray probe</b> |
|-----------------------------|--------------------|---------------------|-------------------------|
| <i>Glycine max</i>          | DGAT3-related A    | Glyma13g17860.1     | #                       |
|                             | DGAT3-related B    | Glyma17g04650.1     | GmaAffx.63392.1.S1_at   |
|                             | WS/DGAT            | Glyma09g32890       | Gma13644.1.S1_at        |
| <i>Arabidopsis thaliana</i> | DGAT3              | AT1G48300           | 262236 at               |
|                             | WDS1               | AT5G37300           | 249614 at               |
