# Supplementary material for: Diversity and evolution of plant diacylglycerol acyltransferase (DGATs) unveiled by phylogenetic, gene structure and expression analyses
Source: PubMed Central journal article supplement (PMC5127155; doi:10.1590/1678-4685-gmb-2016-0024), 2016-10-03
Supplement: 1415-4757-gmb-1678-4685-GMB-2016-0024-Suppl04.pdf [file 1415-4757-gmb-1678-4685-GMB-2016-0024-Suppl04.pdf]

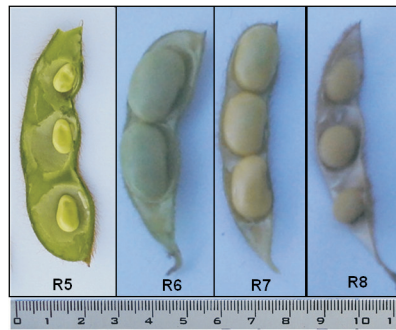

**Figure S1** - Soybean seed development stages (R-stages) used in this study. R5: beginning seed; R6: full seed; R7: beginning maturity and R8: full maturity.
