# Supplementary material for: Diversity and evolution of plant diacylglycerol acyltransferase (DGATs) unveiled by phylogenetic, gene structure and expression analyses
Source: PubMed Central journal article supplement (PMC5127155; doi:10.1590/1678-4685-gmb-2016-0024), 2016-10-03
Supplement: 1415-4757-gmb-1678-4685-GMB-2016-0024-Suppl06.pdf [file 1415-4757-gmb-1678-4685-GMB-2016-0024-Suppl06.pdf]

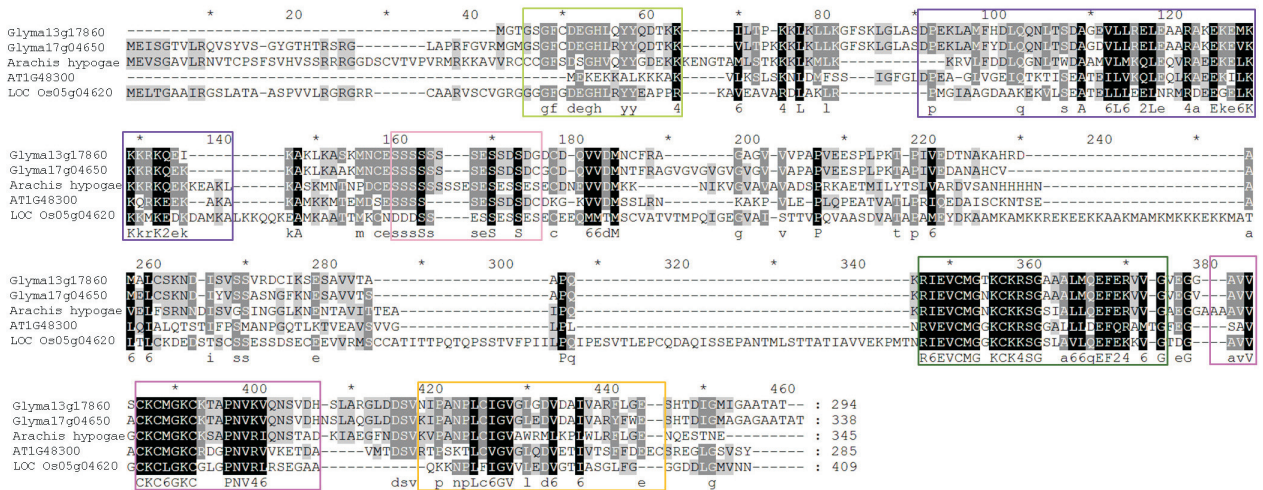

**Figure S3** - Multiple sequence alignment of predicted amino acid sequences of DGAT3 proteins. The DGAT3 sequences from *G. max* (Gma), *A. thaliana* (Ath) and *O. sativa* (Osa) were aligned. Identical residues are shaded black, and similar residues are shaded gray. The color boxes indicate the conserved motifs on protein sequences shown in Figure 2B and 2C.
